# Supplementary material
Source: PubMed Central journal article supplement (PMC7867621)
Supplement: NIHMS1646096-supplement-4.pdf [file NIHMS1646096-supplement-4.pdf]

A

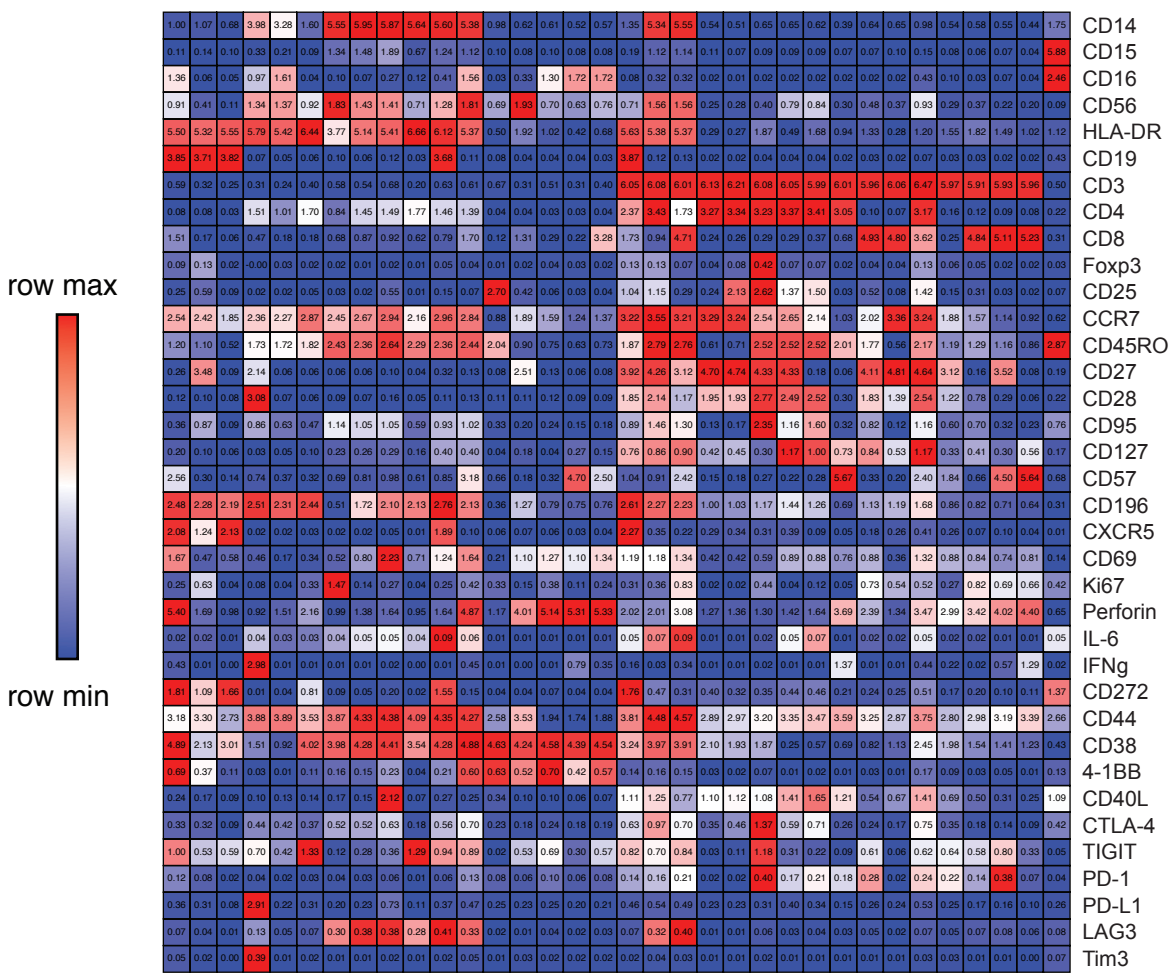

B

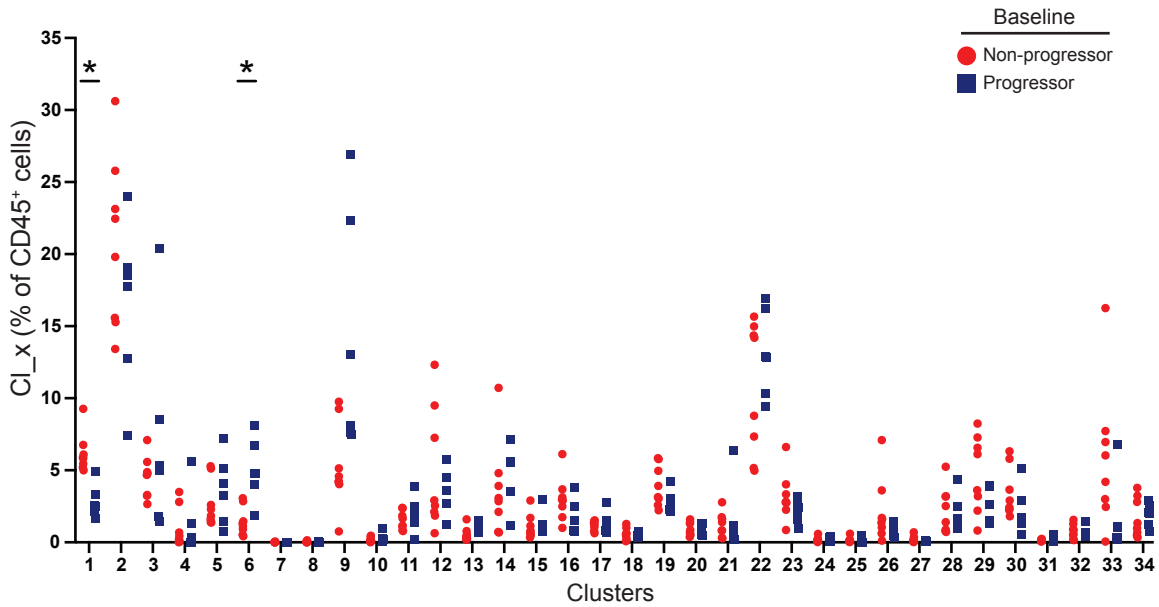

### **Supplementary Figure S1.**

Baseline PBMC samples were analyzed by high-dimensional single cell profiling using mass cytometry. **(A)** Heat map displaying relative expression values of CD45<sup>+</sup> Phenograph defined clusters. Numbers indicate mean CytofAsinh transformed expression values. **(B)** Quantification of CD45<sup>+</sup> Phenograph defined cluster frequencies between Progressors and Non-Progressors. Multiple *t*-tests were performed with Benjamini, Krieger and Yekutieli correction. \*,  $q < 0.05$ .
