# Supplementary material
Source: PubMed Central journal article supplement (PMC7867621)
Supplement: NIHMS1646096-supplement-5.pdf [file NIHMS1646096-supplement-5.pdf]

**A**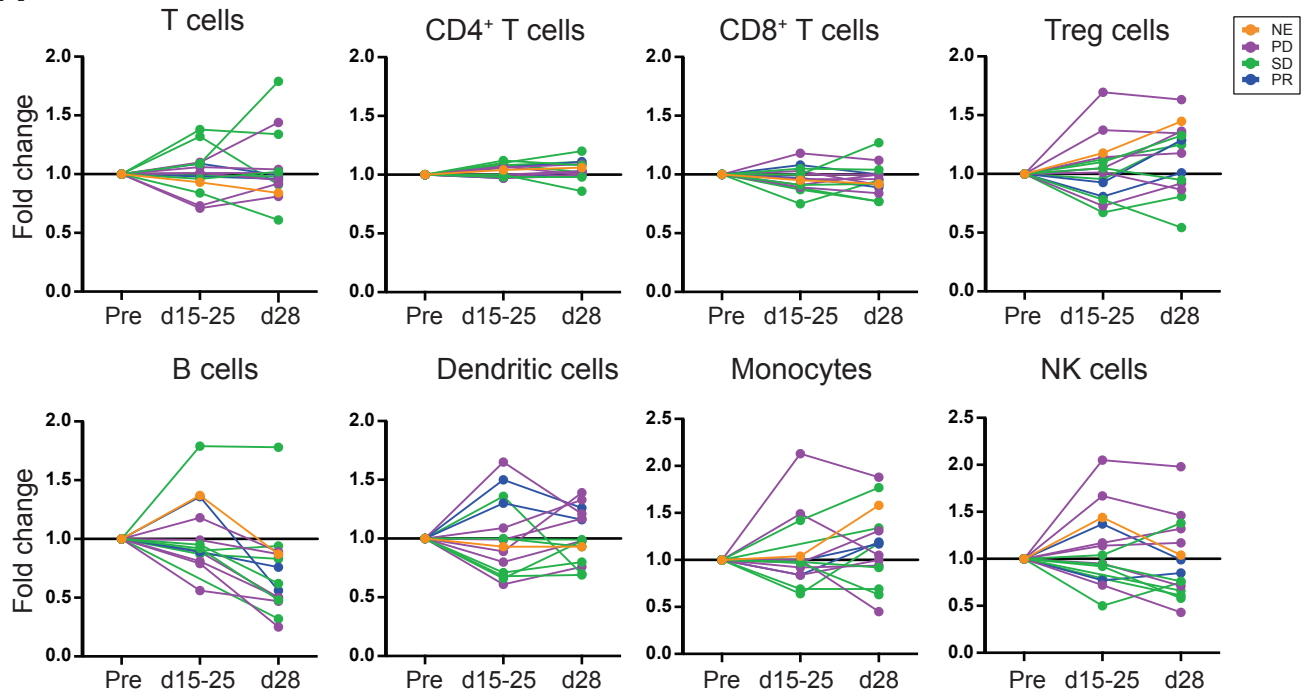**B**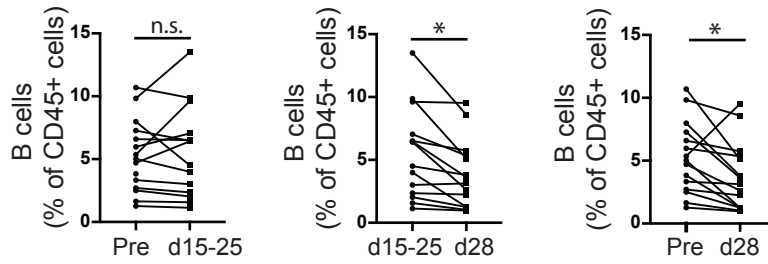**C**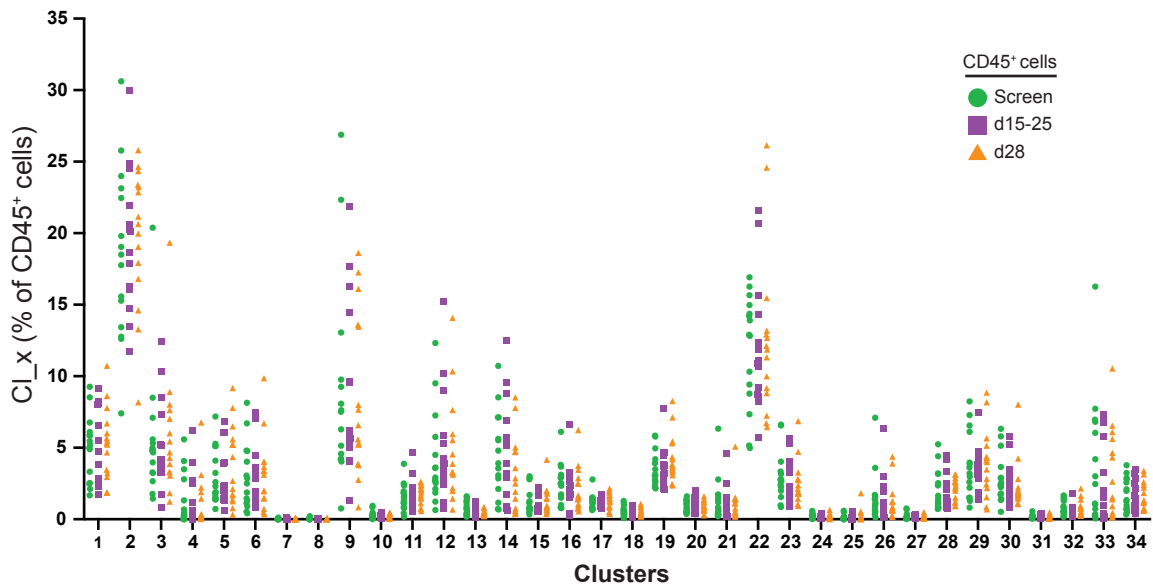

## Supplementary Figure S2.

PBMC were analyzed at indicated timepoints by high-dimensional single cell mass cytometry. **(A)** Manual gating was performed to identify immune subsets. Fold change in CD3<sup>+</sup> T cells, CD3<sup>+</sup>CD4<sup>+</sup> T cells, CD3<sup>+</sup>CD8<sup>+</sup> T cells, CD3<sup>+</sup>CD4<sup>+</sup>CD25<sup>+</sup>CD127<sup>low</sup>Foxp3<sup>+</sup> Treg cells, CD19<sup>+</sup> B cells, CD14<sup>neg</sup>HLA-DR<sup>+</sup> dendritic cells, CD14<sup>+</sup> monocytes and CD16<sup>+</sup>CD56<sup>+</sup> NK cells. **(B)** Quantification of changes in B cell frequency. **(C)** Comparison of CD45<sup>+</sup> Phenograph defined clusters at baseline (pre), after galunisertib (d15-25) and after SBRT (d28). Wilcoxon matched-pairs tests were performed **(B)**. 2-way ANOVA with Tukey's multiple comparisons was performed **(C)**. \*, p < 0.05. n.s., not significant.
