# Supplementary material
Source: PubMed Central journal article supplement (PMC7867621)
Supplement: NIHMS1646096-supplement-6.pdf [file NIHMS1646096-supplement-6.pdf]

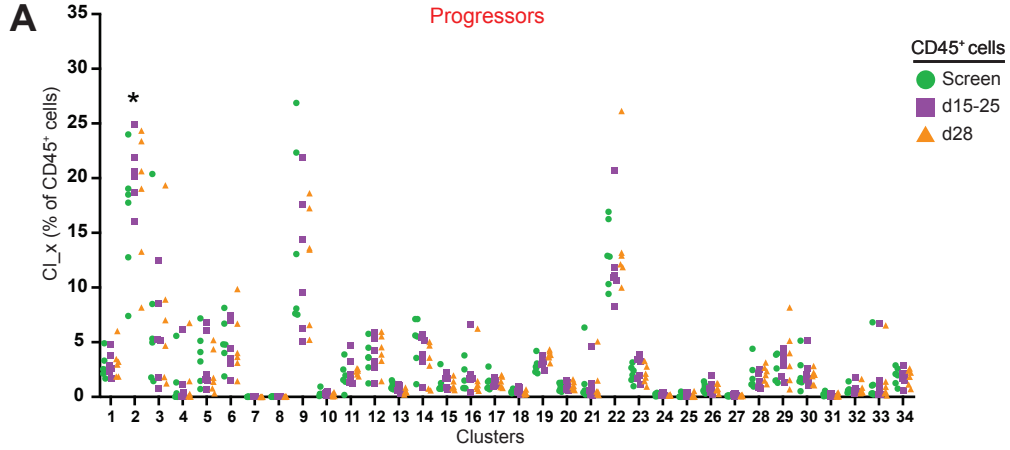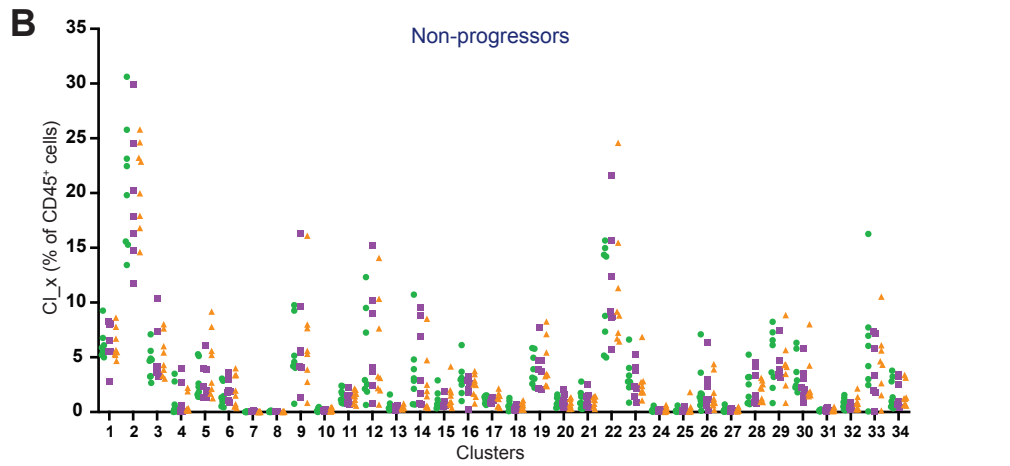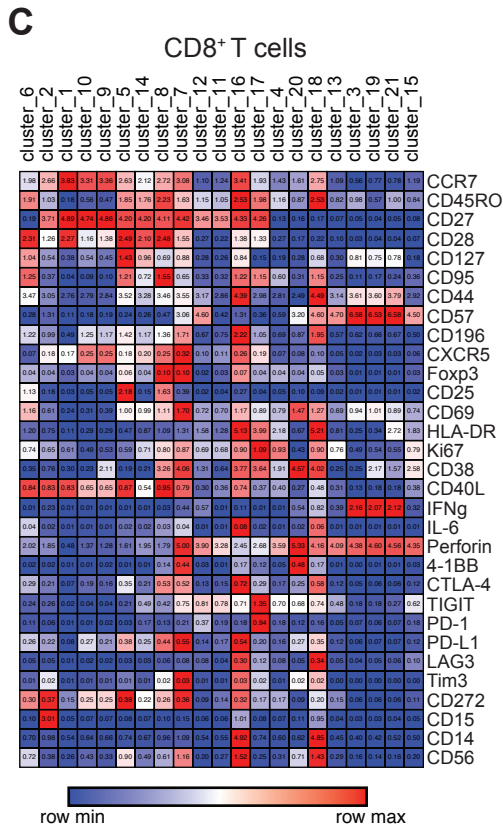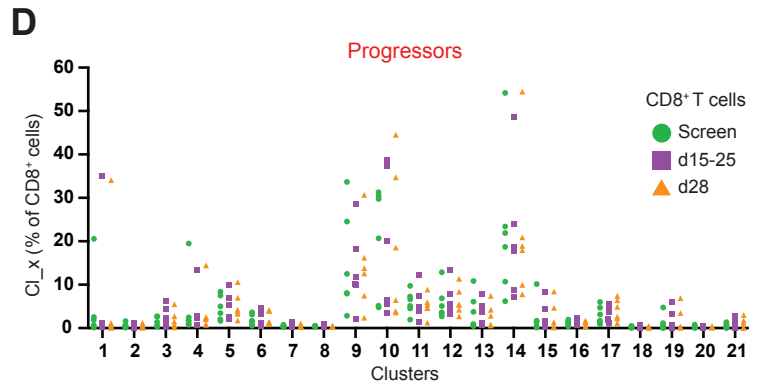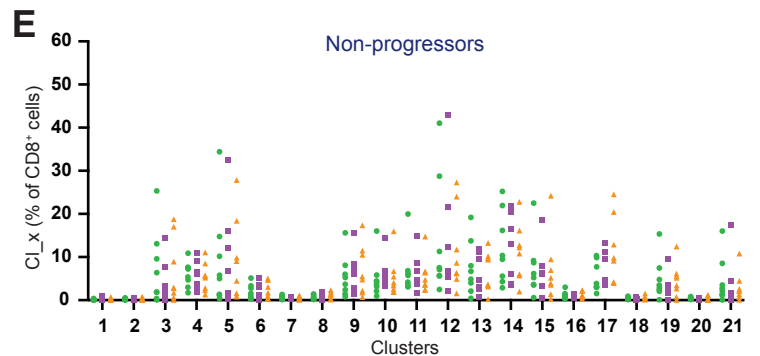

### Supplementary Figure S3.

PBMC from Progressors (P) and Non-Progressors (NP) were analyzed at the indicated timepoints by high-dimensional single cell mass cytometry. **(A-B)**. Comparison of CD45<sup>+</sup> Phenograph defined clusters at baseline (pre), after galunisertib (d15-25) and after SBRT (d28) in Progressors **(A)** and Non-Progressors **(B)**. **(C)** Heat map displaying relative expression values of Phenograph defined CD8<sup>+</sup> clusters. Numbers indicate mean CytofAsinh transformed expression values **(D-E)**. Comparison of CD8<sup>+</sup> Phenograph defined clusters at baseline (pre), after galunisertib (d15-25) and after SBRT (d28) in Progressors **(D)** and Non-Progressors **(E)**. 2-way ANOVA with Tukey's multiple comparisons was performed. \*, adjusted  $p < 0.05$ .
