# Supplementary material
Source: PubMed Central journal article supplement (PMC7867621)
Supplement: NIHMS1646096-supplement-7.pdf [file NIHMS1646096-supplement-7.pdf]

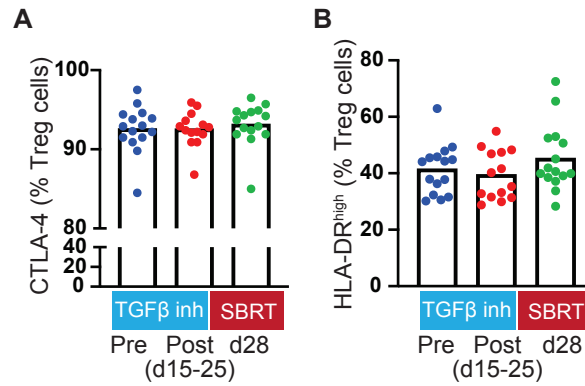

#### Supplementary Figure S4.

PBMC collected at the indicated timepoints were analyzed by high-dimensional single cell mass cytometry. **(A)** Quantification of CTLA-4<sup>+</sup>Treg cells (percentage of Treg cells) in samples pre-treatment and post-treatment with galunisertib and SBRT. **(B)** Quantification of HLA-DR<sup>+</sup>Treg cells (percentage of Treg cells) in samples pre-treatment and post-treatment with galunisertib and SBRT. Mann-Whitney tests were performed. \*,  $p < 0.05$ .
