# Supplementary material
Source: PubMed Central journal article supplement (PMC7867621)

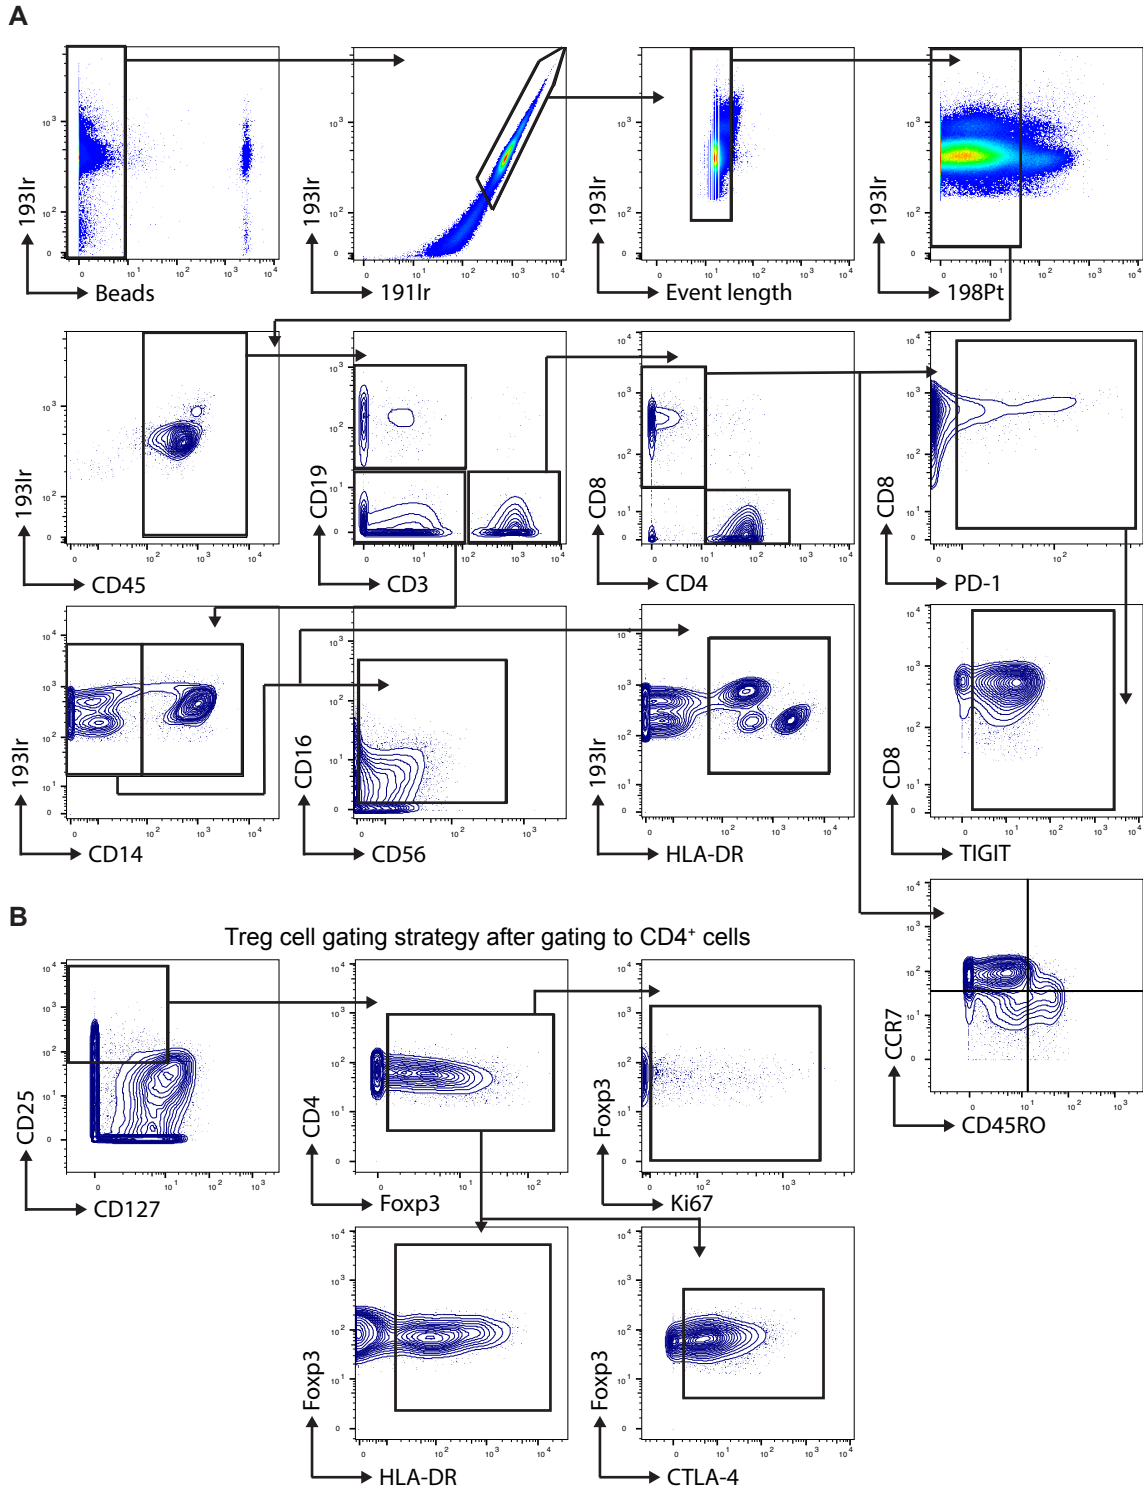

**Supplementary Figure S5. Gating strategy**

Supplement: NIHMS1646096-supplement-8.pdf [file NIHMS1646096-supplement-8.pdf]
